# Supplementary material for: When detection and quantification of mineral fibres in natural raw materials are at their limit – the case of a clay from the Gomsiqe–Puka mining area (Albania)
Source: Copernicus journal article supplement (doi:10.5194/ejm-36-749-2024), 2024-09-10
Supplement: Supplementary file 1 [file ejm-36-749-2024-supplement.pdf]

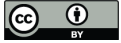

*Supplement of*

**When detection and quantification of mineral fibres in natural raw materials are at their limit – the case of a clay from the Gomsiqe–Puka mining area (Albania)**

**Alessandro F. Gualtieri et al.**

*Correspondence to:* Alessandro F. Gualtieri ([alessandro.gualtieri@unimore.it](mailto:alessandro.gualtieri@unimore.it))

The copyright of individual parts of the supplement might differ from the article licence.

**Fig. S1.** EDS spot analysis of the particles observed in Figure 4. **(a)** Chemical composition compatible with that of tremolite; **(b)** Chemical composition compatible with that of tremolite; **(c)** Chemical composition compatible with that of tremolite; **(d)** Chemical composition compatible with that of tremolite.

**(a)**

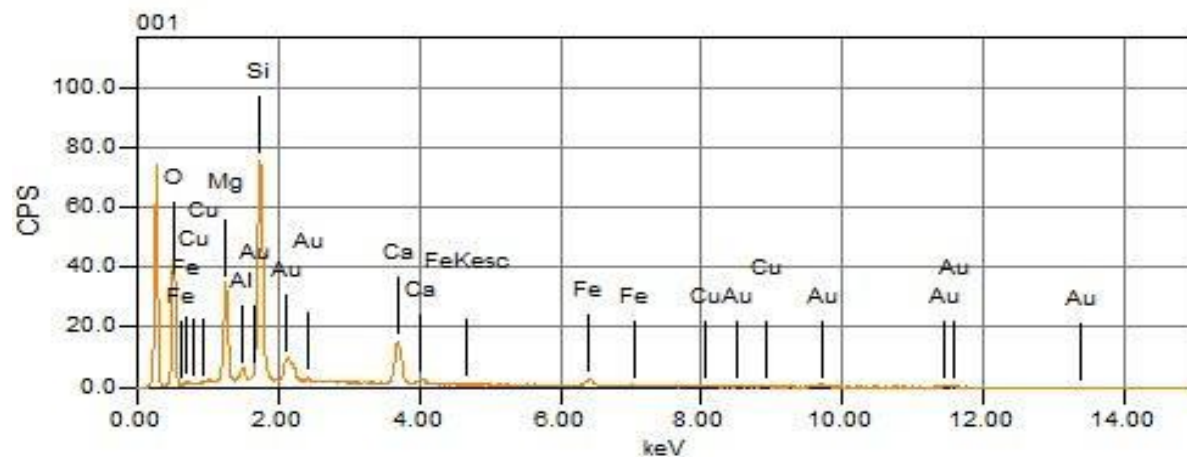

**(b)**

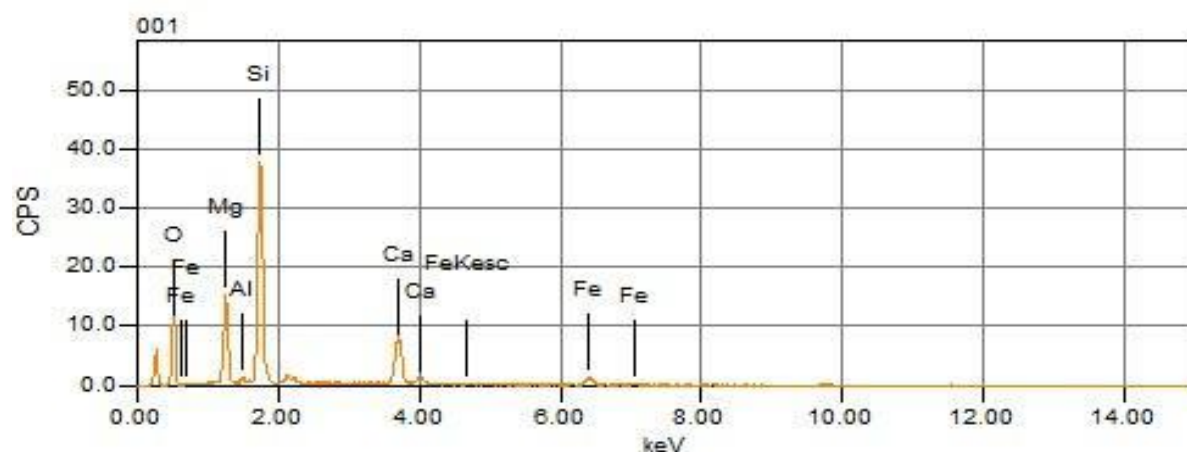

**(c)**

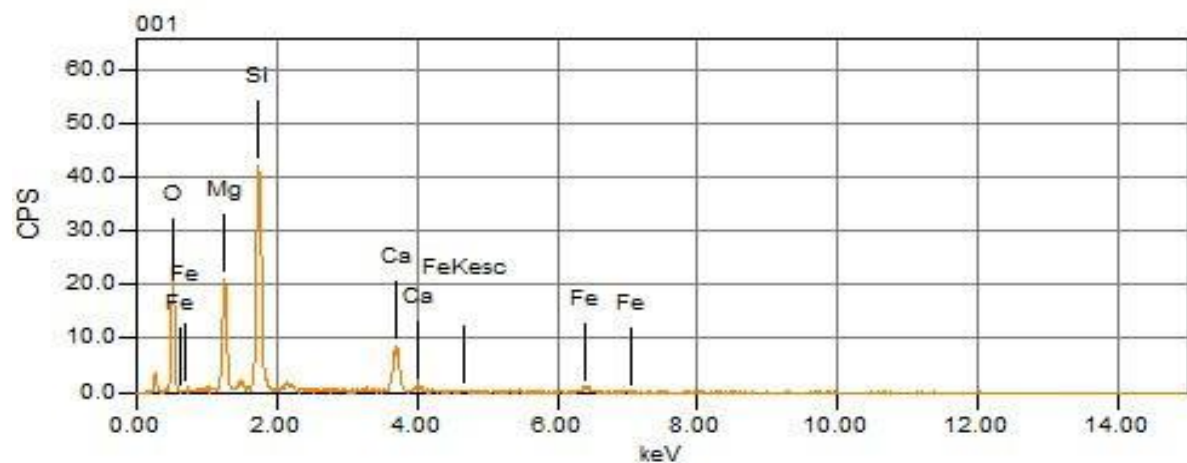

(d)

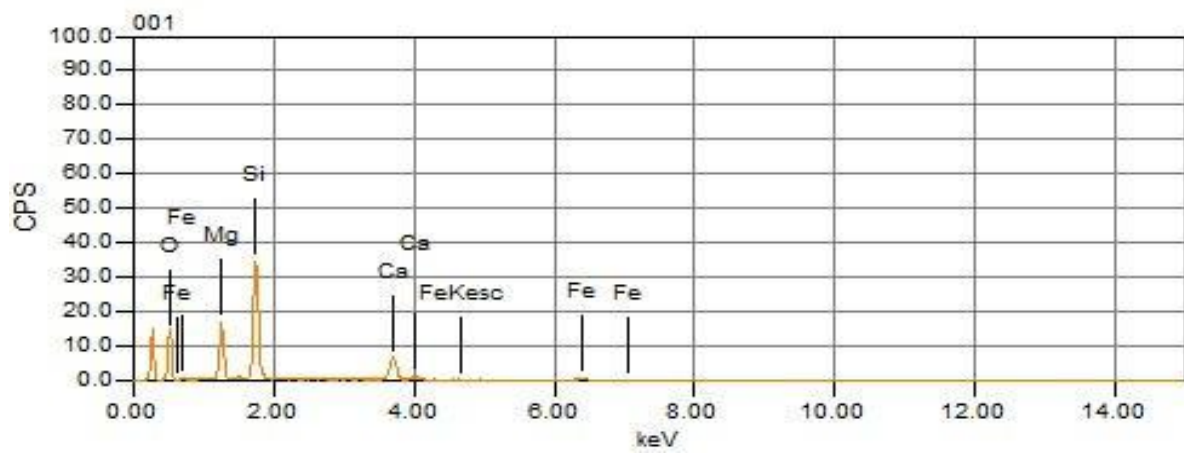

**Fig. S2.** Gallery of SEM images of various crystals. (a) acicular particle with chemical composition (see below) compatible with that of a mica; (b), (c), and (f) clay mineral particles; (d) titanium oxide; (e) cristobalite or quartz.

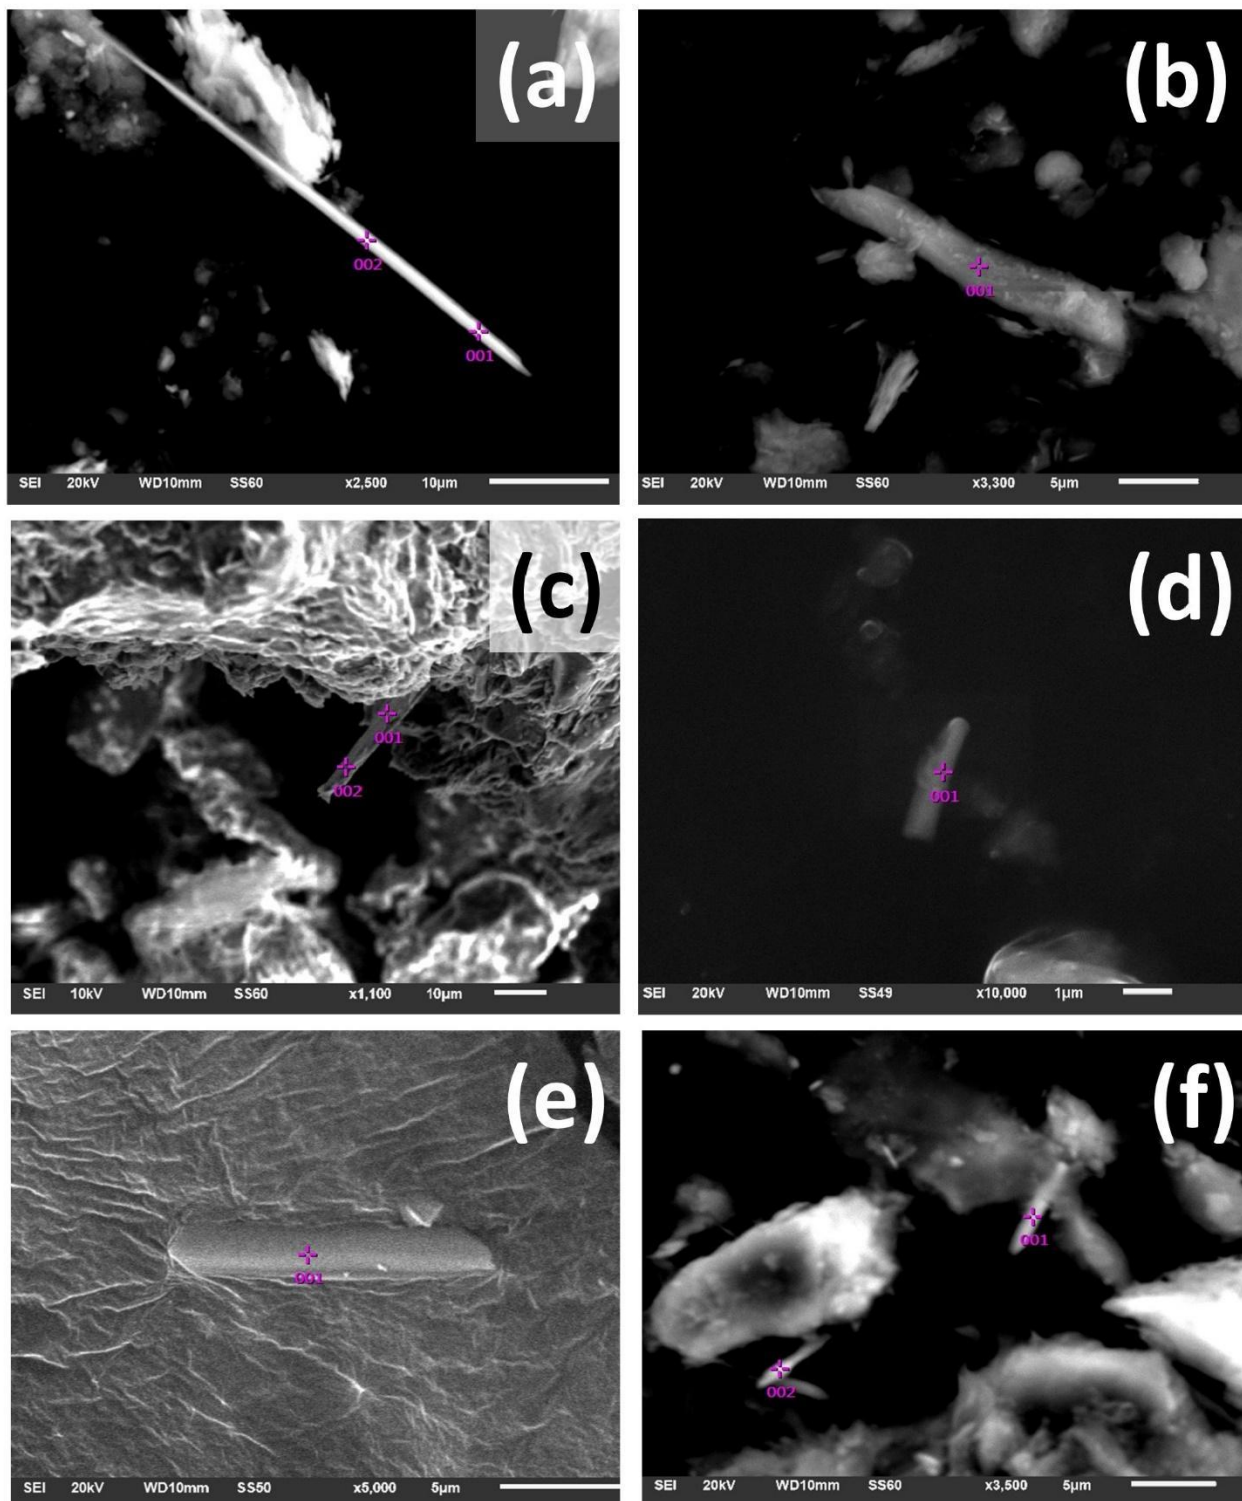

**Fig. S3.** EDS analyses of the SEM images reported in **Fig. S2.**

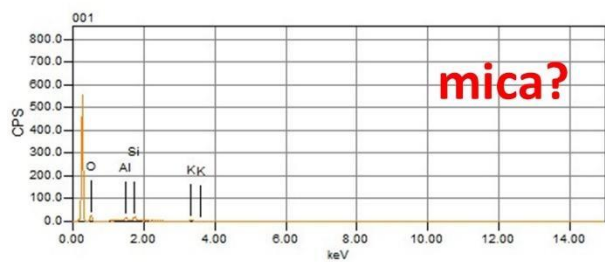

**(a)**

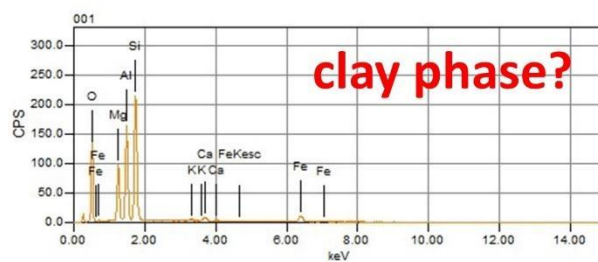

**(b)**

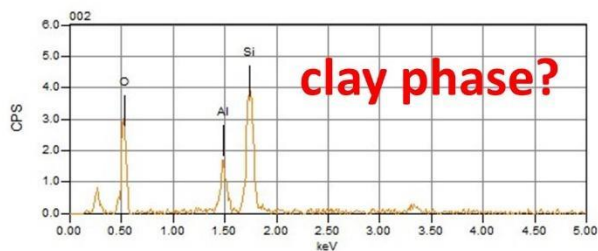

**(c)**

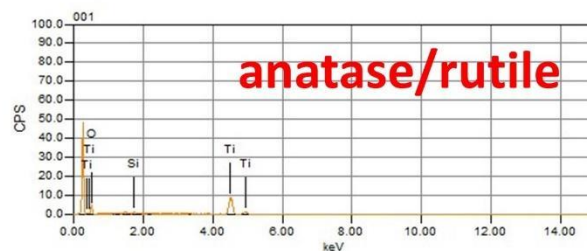

**(d)**

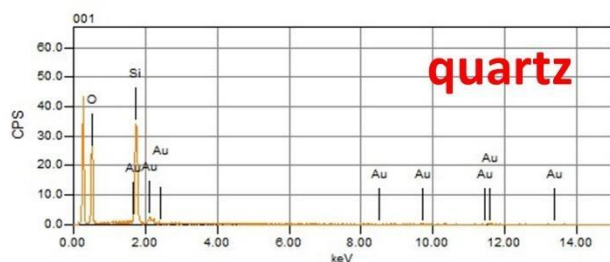

**(e)**

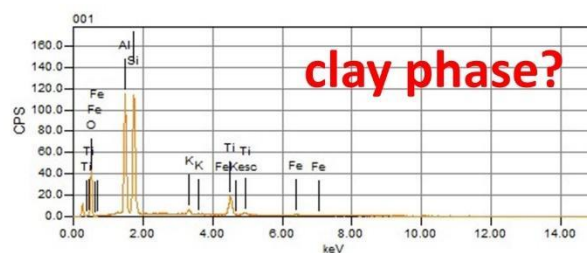

**(f)**

**Table S1.** Main thermal events occurring in the clay sample.

| <b>Label</b> | <b>Start (°C)</b> | <b>End (°C)</b> | <b>Max (°C)</b> | <b>Mass loss (wt%)</b> | <b>Evolved gas</b>                | <b>Reaction type</b>                                                                                   |
|--------------|-------------------|-----------------|-----------------|------------------------|-----------------------------------|--------------------------------------------------------------------------------------------------------|
| A (*)        | 25                | 145             | 78              | 6.45                   | H <sub>2</sub> O                  | Dehydration of smectite                                                                                |
| B (*)        | 145               | 255             | 155             | 0.77                   | H <sub>2</sub> O                  | Dehydration of smectite                                                                                |
| C            | 255               | 370             | nd              | 0.49                   | H <sub>2</sub> O                  | Thermal decomposition of hydroxides                                                                    |
| D (*)        | 370               | 537             | 496             | 3.94                   | H <sub>2</sub> O                  | Dehydroxylation of kaolinite                                                                           |
| E (*)        | 537               | 615             | 565             | 2.14                   | H <sub>2</sub> O                  | Dehydroxylation of smectite                                                                            |
| F (*)        | 615               | 700             | 635             | 0.89                   | CO <sub>2</sub>                   | Thermal decomposition of dolomite (first step)                                                         |
| G (*)        | 700               | 750             | nd              | 0.19                   | H <sub>2</sub> O, CO <sub>2</sub> | Dehydroxylation of tremolite (first step), thermal decomposition of dolomite (second step) and calcite |
| H            | 765               | 895             | 816             | 0.48                   | H <sub>2</sub> O                  | Dehydroxylation of talc                                                                                |
| I            | 950               | 1047            | 982             | 0.047                  | H <sub>2</sub> O                  | Dehydroxylation of tremolite (second step)                                                             |

(\*) The reaction start/end temperature values are defined based on the DTG curve; however, as indicated in the text, due to the partial overlap of each of these reactions with the previous and/or subsequent reaction, each value is intended to be indicative. Similarly, the mass change given for each reaction also does not consider the partial overlap of the reactions. See text for further details.

**Table S2.** EPMA datasheets. **(a)** EPMA data – Al-rich tremolite (\* <d.l.=below detection limit); **(b)** EPMA data – tremolite (\* <d.l.=below detection limit); **(c)** EPMA data – diopside (\* <d.l.=below detection limit).

**(a)**

| Point | Comment     | SiO <sub>2</sub> | TiO <sub>2</sub> | Al <sub>2</sub> O <sub>3</sub> | Cr <sub>2</sub> O <sub>3</sub> | FeO         | MnO         | MgO          | CaO          | Na <sub>2</sub> O | K <sub>2</sub> O | BaO         | tot   |
|-------|-------------|------------------|------------------|--------------------------------|--------------------------------|-------------|-------------|--------------|--------------|-------------------|------------------|-------------|-------|
| 19    | A-6         | 55.86            | 0.09             | 2.14                           | <d.l.                          | 3.88        | 0.03        | 21.31        | 12.02        | 0.40              | 0.01             | <d.l.*      | 95.74 |
| 32    | A-19        | 54.06            | 0.10             | 3.94                           | <d.l.                          | 4.65        | 0.04        | 21.37        | 10.92        | 0.47              | 0.02             | <d.l.       | 95.55 |
| 34    | A-21        | 57.05            | 0.09             | 2.07                           | 0.03                           | 4.12        | 0.06        | 21.03        | 11.50        | 0.40              | 0.01             | <d.l.       | 96.34 |
| 36    | A-23        | 55.72            | 0.16             | 2.50                           | 0.01                           | 4.50        | 0.13        | 21.16        | 11.43        | 0.61              | 0.03             | 0.01        | 96.25 |
| 37    | A-24        | 55.38            | 0.09             | 2.10                           | <d.l.                          | 3.75        | 0.05        | 22.97        | 11.75        | 0.47              | <d.l.            | 0.03        | 96.57 |
| 38    | A-25        | 55.13            | 0.06             | 2.34                           | <d.l.                          | 4.07        | 0.07        | 22.87        | 11.62        | 0.38              | <d.l.            | <d.l.       | 96.54 |
| 31    | A-18        | 57.37            | 0.06             | 2.00                           | <d.l.                          | 3.67        | 0.07        | 20.42        | 12.03        | 0.20              | 0.01             | 0.02        | 95.84 |
|       | <b>mean</b> | <b>55.79</b>     | <b>0.09</b>      | <b>2.44</b>                    | <b>0.01</b>                    | <b>4.09</b> | <b>0.06</b> | <b>21.59</b> | <b>11.61</b> | <b>0.42</b>       | <b>0.01</b>      | <b>0.01</b> |       |

**Cations calculated on the basis of 23 oxygen atoms**

|    |             | Si           | Al           | Mg           | Ca           | Fe           | Ti           | Mn           | Na           |
|----|-------------|--------------|--------------|--------------|--------------|--------------|--------------|--------------|--------------|
| 19 | A-6         | 7.796        | 0.352        | 4.435        | 1.797        | 0.580        | 0.009        | 0.004        | 0.094        |
| 32 | A-19        | 7.573        | 0.650        | 4.463        | 1.638        | 0.698        | 0.010        | 0.004        | 0.110        |
| 34 | A-21        | 7.888        | 0.337        | 4.334        | 1.704        | 0.611        | 0.009        | 0.007        | 0.092        |
| 36 | A-23        | 7.751        | 0.411        | 4.387        | 1.703        | 0.671        | 0.017        | 0.015        | 0.141        |
| 37 | A-24        | 7.679        | 0.343        | 4.748        | 1.745        | 0.557        | 0.009        | 0.005        | 0.108        |
| 38 | A-25        | 7.650        | 0.382        | 4.730        | 1.728        | 0.605        | 0.006        | 0.008        | 0.087        |
| 31 | A-18        | 7.956        | 0.327        | 4.221        | 1.787        | 0.546        | 0.006        | 0.008        | 0.046        |
|    | <b>mean</b> | <b>7.756</b> | <b>0.400</b> | <b>4.474</b> | <b>1.729</b> | <b>0.609</b> | <b>0.010</b> | <b>0.007</b> | <b>0.097</b> |

**Calculated chemical formula**

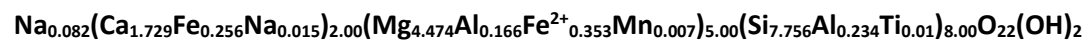

(b)

| Point | Comment | SiO <sub>2</sub> | TiO <sub>2</sub> | Al <sub>2</sub> O <sub>3</sub> | Cr <sub>2</sub> O <sub>3</sub> | FeO         | MnO         | MgO          | CaO          | Na <sub>2</sub> O | K <sub>2</sub> O | BaO         | tot   |
|-------|---------|------------------|------------------|--------------------------------|--------------------------------|-------------|-------------|--------------|--------------|-------------------|------------------|-------------|-------|
| 9     | A-1     | 55.81            | 0.06             | 0.54                           | 0.02                           | 3.20        | 0.06        | 23.28        | 12.59        | 0.10              | <d.l.*           | <d.l.       | 95.65 |
| 11    | A-3     | 55.19            | 0.06             | 0.66                           | 0.04                           | 3.06        | 0.09        | 23.85        | 12.39        | 0.16              | 0.01             | 0.01        | 95.52 |
| 20    | A-7     | 56.44            | 0.01             | 0.53                           | 0.02                           | 2.74        | 0.07        | 23.32        | 12.50        | 0.14              | <d.l.            | 0.03        | 95.78 |
| 23    | A-10    | 57.41            | 0.03             | 0.78                           | 0.02                           | 3.23        | 0.11        | 20.66        | 12.52        | 0.19              | 0.02             | 0.01        | 94.97 |
| 24    | A-11    | 55.93            | 0.06             | 1.00                           | 0.02                           | 3.43        | 0.07        | 21.15        | 12.36        | 0.25              | <d.l.            | <d.l.       | 94.28 |
| 31    | A-18    | 56.59            | 0.05             | 1.26                           | 0.01                           | 3.75        | 0.09        | 21.03        | 12.47        | 0.24              | 0.01             | <d.l.       | 95.49 |
| 35    | A-22    | 59.93            | 0.07             | 1.37                           | 0.02                           | 3.50        | 0.09        | 17.63        | 11.96        | 0.26              | <d.l.            | 0.01        | 94.83 |
|       | mean    | <b>56.75</b>     | <b>0.05</b>      | <b>0.88</b>                    | <b>0.02</b>                    | <b>3.27</b> | <b>0.08</b> | <b>21.56</b> | <b>12.40</b> | <b>0.19</b>       | <b>&lt;d.l.</b>  | <b>0.01</b> |       |

**Cations calculated on the basis of 23 oxygen atoms**

|    |      | Si    | Al    | Mg    | Ca    | Fe    | Ti    | Mn    | Na    |
|----|------|-------|-------|-------|-------|-------|-------|-------|-------|
| 9  | A-1  | 7.807 | 0.088 | 4.856 | 1.887 | 0.479 | 0.007 | 0.007 | 0.023 |
| 11 | A-3  | 7.742 | 0.110 | 4.988 | 1.863 | 0.459 | 0.006 | 0.011 | 0.038 |
| 20 | A-7  | 7.864 | 0.087 | 4.843 | 1.866 | 0.409 | 0.001 | 0.008 | 0.031 |
| 23 | A-10 | 8.043 | 0.128 | 4.316 | 1.879 | 0.484 | 0.003 | 0.014 | 0.044 |
| 24 | A-11 | 7.919 | 0.167 | 4.464 | 1.876 | 0.521 | 0.006 | 0.009 | 0.059 |
| 31 | A-18 | 7.913 | 0.207 | 4.385 | 1.869 | 0.561 | 0.005 | 0.011 | 0.055 |
| 35 | A-22 | 8.328 | 0.225 | 3.651 | 1.780 | 0.520 | 0.007 | 0.011 | 0.061 |
|    | mean | 7.945 | 0.145 | 4.500 | 1.860 | 0.491 | 0.005 | 0.010 | 0.045 |

**Calculated chemical formula**

tremolite (Ca<sub>1.86</sub>Fe<sub>0.096</sub>Na<sub>0.045</sub>)<sub>2.001</sub>(Mg<sub>4.5</sub>Al<sub>0.095</sub>Fe<sup>2+</sup><sub>0.395</sub>Mn<sub>0.01</sub>)<sub>5.00</sub>(Si<sub>7.945</sub>Al<sub>0.05</sub>Ti<sub>0.005</sub>)<sub>8.00</sub>O<sub>22</sub>(OH)<sub>2</sub>



(c)

| Point | Comment     | SiO <sub>2</sub> | TiO <sub>2</sub> | Al <sub>2</sub> O <sub>3</sub> | Cr <sub>2</sub> O <sub>3</sub> | FeO         | MnO         | MgO          | CaO          | Na <sub>2</sub> O | K <sub>2</sub> O | BaO         | tot          |
|-------|-------------|------------------|------------------|--------------------------------|--------------------------------|-------------|-------------|--------------|--------------|-------------------|------------------|-------------|--------------|
| 39    | B-4         | 52.16            | 0.31             | 2.96                           | 0.54                           | 4.29        | 0.19        | 15.94        | 22.05        | 0.35              | 0.01             | 0.01        | 98.79        |
| 40    | B-5         | 52.42            | 0.33             | 3.02                           | 0.64                           | 4.70        | 0.11        | 16.18        | 22.00        | 0.37              | 0.01             | <d.l.*      | 99.76        |
| 41    | B-6         | 52.70            | 0.29             | 3.00                           | 0.53                           | 4.42        | 0.12        | 16.30        | 22.18        | 0.40              | <d.l.            | 0.02        | 99.94        |
| 43    | B-8         | 54.20            | 0.34             | 3.35                           | 0.53                           | 4.30        | 0.14        | 15.19        | 21.73        | 0.37              | <d.l.            | 0.03        | 100.17       |
| 44    | B-9         | 52.48            | 0.38             | 3.09                           | 0.50                           | 4.43        | 0.12        | 14.81        | 22.21        | 0.38              | 0.01             | <d.l.       | 98.39        |
| 45    | B-10        | 54.03            | 0.33             | 3.04                           | 0.44                           | 4.54        | 0.07        | 15.25        | 21.97        | 0.34              | 0.02             | 0.02        | 100.04       |
| 49    | B-14        | 51.71            | 0.38             | 3.08                           | 0.49                           | 4.33        | 0.14        | 15.38        | 22.26        | 0.34              | <d.l.            | 0.01        | 98.11        |
| 52    | B-17        | 53.35            | 0.42             | 2.99                           | 0.31                           | 4.48        | 0.20        | 15.94        | 22.18        | 0.38              | 0.01             | <d.l.       | 100.24       |
| 55    | B-20        | 52.32            | 0.36             | 2.78                           | 0.35                           | 4.51        | 0.11        | 16.03        | 22.42        | 0.39              | <d.l.            | <d.l.       | 99.29        |
| 56    | B-21        | 52.58            | 0.42             | 3.06                           | 0.32                           | 4.59        | 0.08        | 15.12        | 21.94        | 0.36              | <d.l.            | 0.03        | 98.50        |
| 64    | B-29        | 52.62            | 0.41             | 2.79                           | 0.30                           | 4.46        | 0.14        | 16.43        | 21.85        | 0.33              | 0.01             | <d.l.       | 99.33        |
| 14    | B-3         | 52.30            | 0.39             | 2.89                           | 0.37                           | 4.60        | 0.17        | 15.26        | 22.25        | 0.28              | 0.01             | 0.01        | 98.51        |
|       | <b>mean</b> | <b>52.74</b>     | <b>0.36</b>      | <b>3.00</b>                    | <b>0.44</b>                    | <b>4.47</b> | <b>0.13</b> | <b>15.65</b> | <b>22.09</b> | <b>0.36</b>       | <b>0.01</b>      | <b>0.01</b> | <b>99.26</b> |

**Cations calculated on the basis of 6 oxygen atoms**

|    |      | Si    | Al    | Mg    | Ca    | Fe    | Ti    | Mn    | Na    |
|----|------|-------|-------|-------|-------|-------|-------|-------|-------|
| 39 | B-4  | 1.927 | 0.129 | 0.877 | 0.873 | 0.170 | 0.008 | 0.006 | 0.022 |
| 40 | B-5  | 1.920 | 0.130 | 0.884 | 0.863 | 0.184 | 0.009 | 0.003 | 0.022 |
| 41 | B-6  | 1.924 | 0.129 | 0.887 | 0.867 | 0.173 | 0.008 | 0.004 | 0.024 |
| 43 | B-8  | 1.961 | 0.143 | 0.820 | 0.843 | 0.167 | 0.009 | 0.004 | 0.022 |
| 44 | B-9  | 1.943 | 0.135 | 0.818 | 0.881 | 0.176 | 0.011 | 0.004 | 0.024 |
| 45 | B-10 | 1.960 | 0.130 | 0.825 | 0.854 | 0.176 | 0.009 | 0.002 | 0.020 |
| 49 | B-14 | 1.924 | 0.135 | 0.853 | 0.887 | 0.173 | 0.011 | 0.004 | 0.021 |
| 52 | B-17 | 1.935 | 0.128 | 0.862 | 0.862 | 0.174 | 0.011 | 0.006 | 0.023 |
| 55 | B-20 | 1.923 | 0.120 | 0.878 | 0.883 | 0.178 | 0.010 | 0.004 | 0.024 |
| 56 | B-21 | 1.941 | 0.133 | 0.832 | 0.868 | 0.182 | 0.012 | 0.003 | 0.022 |
| 64 | B-29 | 1.927 | 0.120 | 0.897 | 0.857 | 0.175 | 0.011 | 0.004 | 0.020 |

|    |      |              |              |              |              |              |              |              |              |
|----|------|--------------|--------------|--------------|--------------|--------------|--------------|--------------|--------------|
| 14 | B-3  | 1.935        | 0.126        | 0.842        | 0.882        | 0.182        | 0.011        | 0.005        | 0.017        |
|    | mean | <b>1.935</b> | <b>0.130</b> | <b>0.856</b> | <b>0.868</b> | <b>0.176</b> | <b>0.010</b> | <b>0.004</b> | <b>0.022</b> |

Calculated chemical formula

diopside **(Ca<sub>0.868</sub>Fe<sub>0.111</sub>Na<sub>0.022</sub>)(Mg<sub>0.856</sub>Al<sub>0.075</sub>Fe<sup>2+</sup><sub>0.065</sub>Mn<sub>0.004</sub>)(Si<sub>1.935</sub>Al<sub>0.055</sub>Ti<sub>0.01</sub>)<sub>2</sub>O<sub>6</sub>**
